# Supplementary material for: Last glacial inception trajectories for the Northern Hemisphere from coupled ice and climate modelling
Source: Copernicus journal article supplement (doi:10.5194/cp-17-397-2021), 2021-02-15
Supplement: Supplementary file 1 [file cp-17-397-2021-supplement.pdf]

Supplement of *Clim. Past*, 17, 397–418, 2021  
<https://doi.org/10.5194/cp-17-397-2021-supplement>  
© Author(s) 2021. This work is distributed under  
the Creative Commons Attribution 4.0 License.

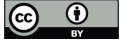

*Supplement of*

## **Last glacial inception trajectories for the Northern Hemisphere from coupled ice and climate modelling**

**Taimaz Bahadory et al.**

*Correspondence to:* Lev Tarasov (lev@mun.ca)

The copyright of individual parts of the supplement might differ from the CC BY 4.0 License.

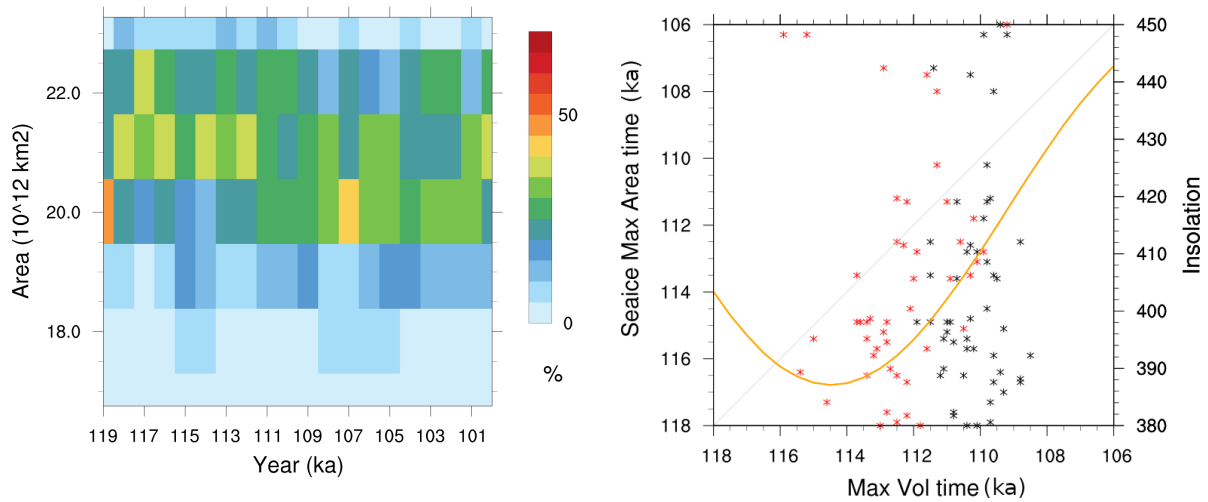

**Figure 1.** Ensemble distribution of the NH seasonal maximum sea ice area during the inception period. **b.** Timing of the late-winter sea ice area maximum against timing of the NA (black) and EA (red) ice sheet maximum volumes.

## 1 Sea ice

The Atlantic sea ice area variation pattern also follows the total NH sea ice area. While the maximum sea ice extent is less variable through time, the minimum sea ice extent reaches its largest extent around 114 ka, and its smallest extent between 107 and 105 ka. Regardless of the the glacial stage I are in (growth or shrink phase), the southward extent of the sea ice in the North Atlantic can never move below the 44°N (the same latitude as the jet-stream over the North Atlantic), which is reached shortly after entering the glacial period. The minimum extent, on the other hand, is well north of the 44°N, and therefore can freely oscillate with the cooling and warming of the stadial and interstadial phases (9th month in figure 2).

## 2 Atlantic meridional heat transport

## 3 Cross-continental correlations

## 10 4 Model bias for present-day precipitation

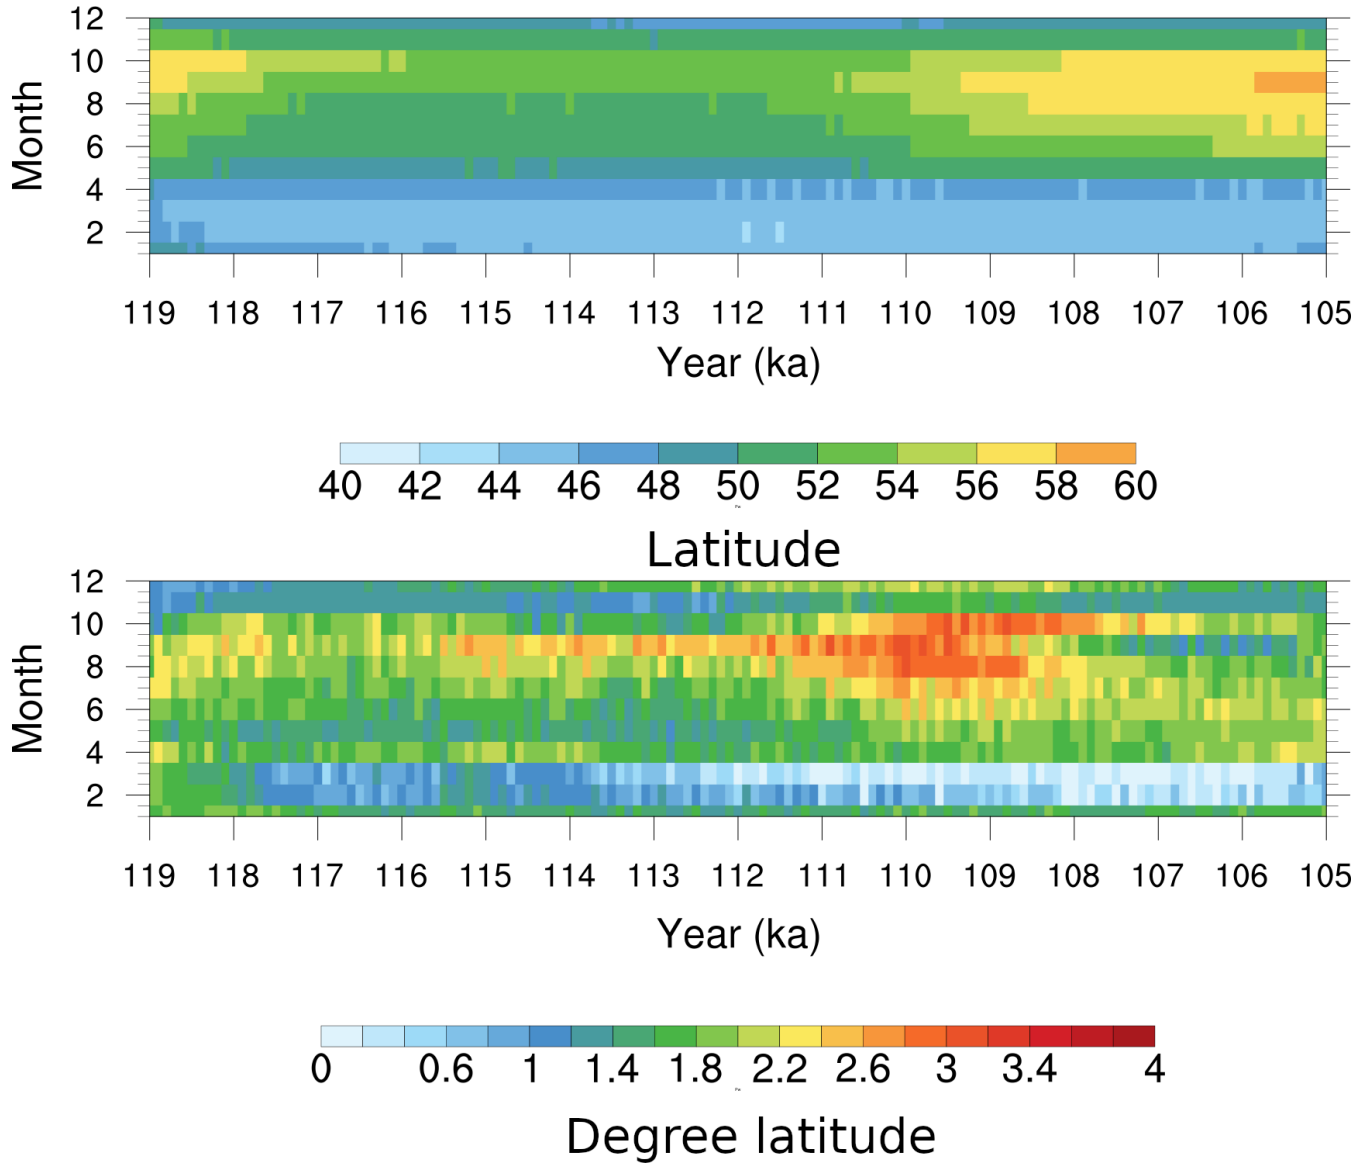

**Figure 2.** Monthly lowest latitude of the sea ice in the North Atlantic from 119 ka to 105 ka. Vertical axis shows each month, and the horizontal axis is the simulation year. Colors represent the lowest latitude. **top** ensemble mean, and **bottom** ensemble standard deviation.

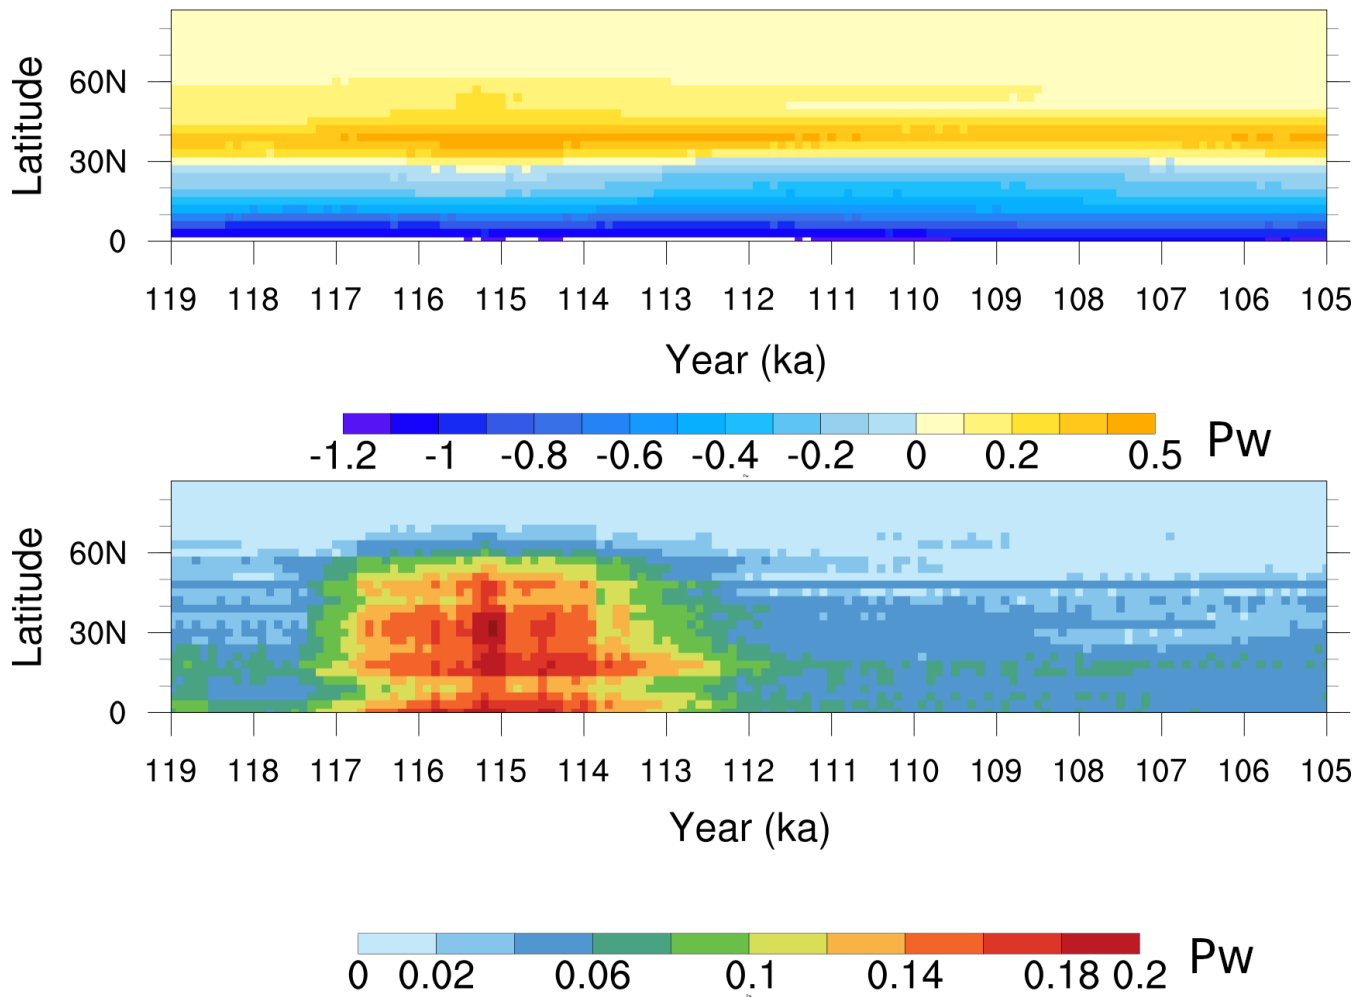

**Figure 3.** Atlantic meridional northward heat transport **top.** ensemble mean and, **bottom.** standard deviation through the LGI.

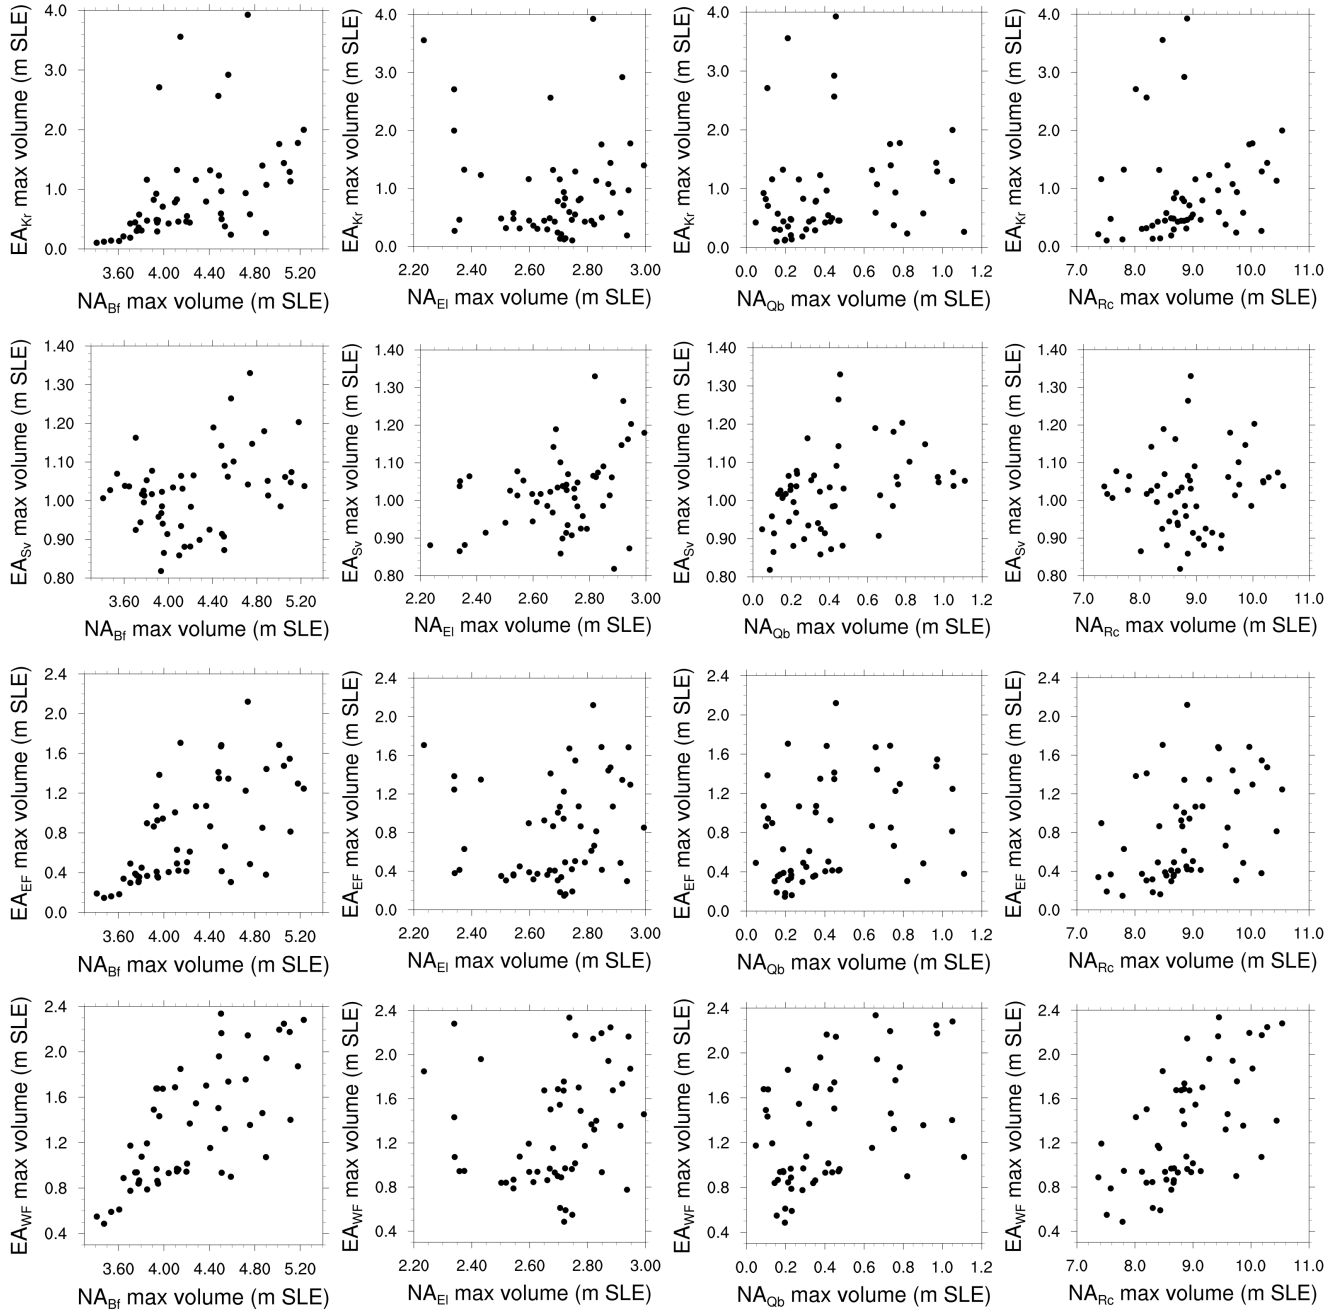

**Figure 4.** Correlation plots of maximum ice volume between NA and EA diagnostic sectors.

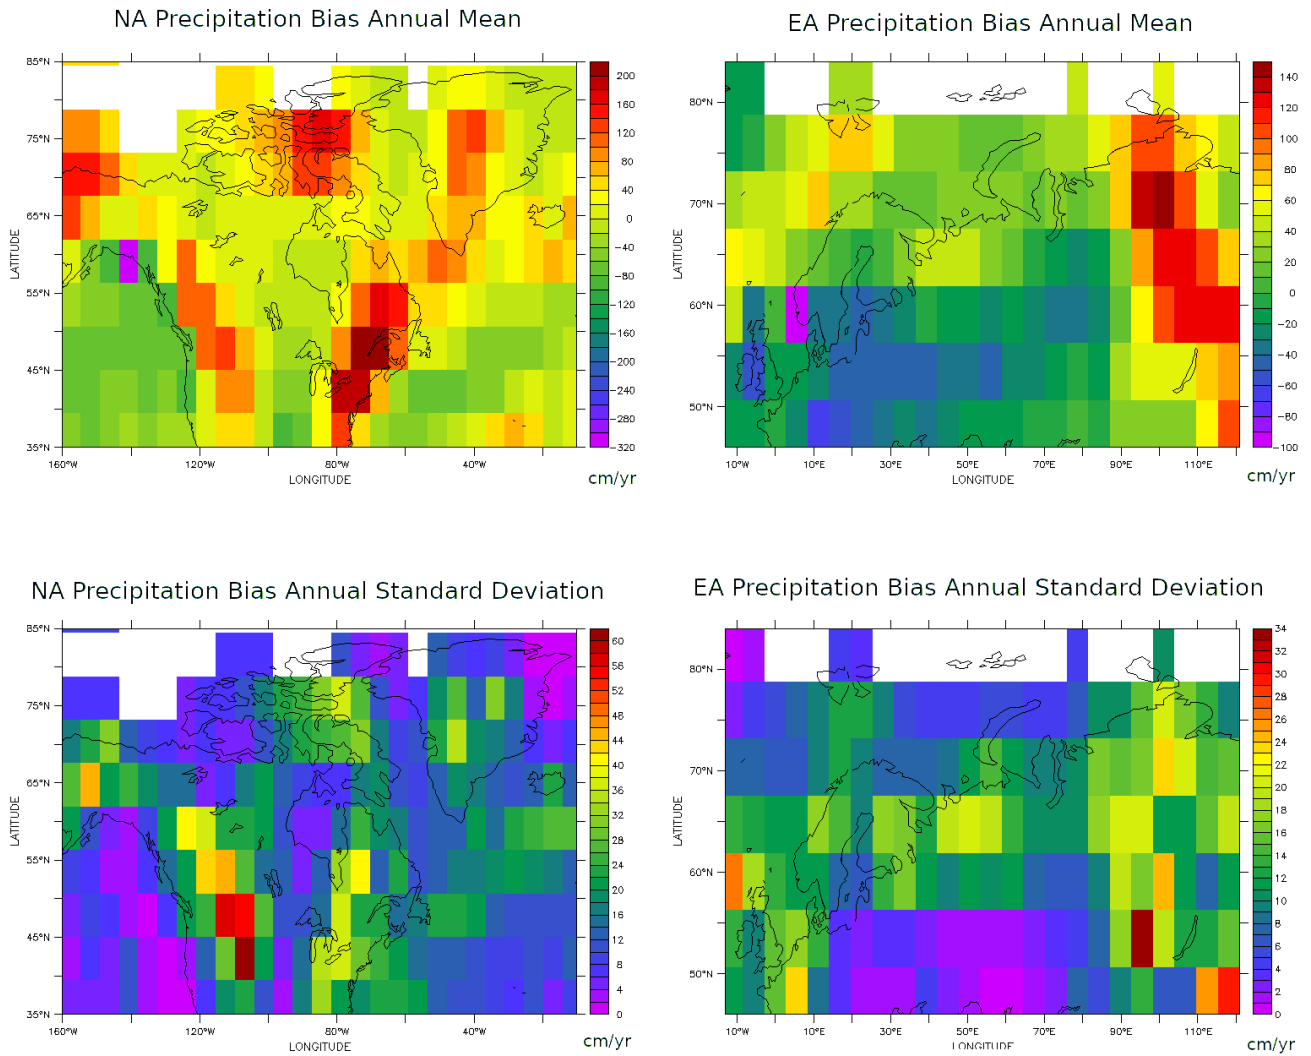

**Figure 5.** Mean present-day annual precipitation bias of the reduced 55 member sub-ensemble relative to the NCEP reanalysis climatology.
